# Supplementary material for: Tri-(Fe/F/N)-doped porous carbons as electrocatalysts for the oxygen reduction reaction in both alkaline and acidic media
Source: Royal Society of Chemistry journal article supplement (doi:10.1039/d0nr04920d), 2020-01-01
Supplement: d0nr04920d1.pdf [file d0nr04920d1.pdf]

## Electronic Supplementary Information

### Tri-(Fe/F/N)-Doped Porous Carbons as Electrocatalysts for Oxygen Reduction Reaction in Both Alkaline and Acidic Media

Yongxing Diao<sup>a,b</sup>, Hanmeng Liu<sup>a,b</sup>, Zhixia Yao<sup>a,b</sup>, Yaosheng Liu<sup>a,b</sup>, Guangxing Hu<sup>a,b</sup>,  
Qifang Zhang<sup>a,d</sup>, Zhuang Li<sup>a,b,c\*</sup>

<sup>a</sup> State Key Laboratory of Electroanalytical Chemistry, Changchun Institute of Applied Chemistry,  
Chinese Academy of Sciences, Changchun, Jilin, 130022, China

<sup>b</sup> University of Science and Technology of China, Hefei, Anhui, 230026, China

<sup>c</sup> University of Chinese Academy of Sciences, Beijing, 100049, China

<sup>d</sup> College of Chemistry, Jilin Normal University, Siping, Jilin, 136000, China

\* Corresponding Author. Fax/Tel: +86-431-85262057;

E-mail: [zli@ciac.ac.cn](mailto:zli@ciac.ac.cn).

## Experimental

### 1. Materials

Zinc nitrate hexahydrate ( $\text{Zn}(\text{NO}_3)_2 \cdot 6\text{H}_2\text{O}$ ) was bought from Xilong Chemical Industry Co., Ltd. Iron(III) acetylacetonate ( $\text{Fe}(\text{acac})_3$ ) was purchased from Macklin Biochemical Co., Ltd. 2-Methylimidazole (2-mIM) was received from Aladdin Industrial Inc. Ammonium fluoride ( $\text{NH}_4\text{F}$ ), potassium hydroxide (KOH), perchloric acid ( $\text{HClO}_4$ ), methanol, and ethanol were purchased from Beijing Chemical Factory. Pt/C catalyst (20 wt% Pt on carbon-support) was bought from Alfa Aesar. Nafion solution (5 wt%) was obtained from Sigma-Aldrich. All chemicals were used without further purification. Ultrapure water used in all the experiments was produced by an ultrapure water machine.

### 2. Synthesis of ZIF-8 and Fe-ZIF-8

In a typical procedure, 60 mL of 0.1 M  $\text{Zn}(\text{NO}_3)_2$  solution was prepared in methanol as solution A, and 120 mL of 0.2 M 2-methylimidazole solution (containing 1.32 g of  $\text{Fe}(\text{acac})_3$  when preparing Fe-ZIF-8) was prepared in methanol as solution B. Solution A was poured into solution B and stirred vigorously at 25 °C for 24 h. The resulting product was centrifuged, washed with methanol several times, and dried under vacuum at 60 °C overnight.

### 3. Synthesis of NC, FeNC, and FeFNC-X

Typically, ZIF-8 or Fe-ZIF-8 powder was transferred to a porcelain boat

and placed in a tube furnace. The samples were heated to 950 °C and maintained at 950 °C for 1 h, with a temperature increase rate of 5 °C min<sup>-1</sup>, continuous flow under N<sub>2</sub> atmosphere, and then naturally cooled to room temperature. After that, a given amount of the obtained FeNC powder and NH<sub>4</sub>F were dispersed ultrasonically in 10 mL H<sub>2</sub>O. The mixture was stirred for 12 h and freeze-dried. Then the ground resulting powder was pyrolysed at 400 °C for 30 min, 900 °C for 1 h with a temperature increase rate of 5 °C min<sup>-1</sup> under a continuous flow of N<sub>2</sub> atmosphere and then naturally cooled to room temperature, then pretreated in 1 M HNO<sub>3</sub> to remove unstable substances. In this work, the mass ratio of NH<sub>4</sub>F and FeNC was set to be 1, 3, 5, 10, 20 to investigate the effect of different F content on ORR performance. As a result, the F doped samples were denoted as FeFNC-1, FeFNC-3, FeFNC-5, FeFNC-10, and FeFNC-20, respectively.

#### 4. Material characterization

The morphology and composition characterizations were obtained by scanning electronic microscopy (SEM, XL-30 ESEM FEG), transmission electron microscopy (TEM, Thermo Fischer Talos F200x), X-ray diffraction (XRD, D8 ADVANCE), X-ray photoelectron spectroscopy (XPS, Thermo Electron Corp. ESCALABMK II equipped with Al K $\alpha$ exciting source), Raman spectroscopy (Renishaw 2000, 514.5 nm excitation wavelength). Nitrogen adsorption and desorption isotherms were obtained at 77 K with a surface area analyzer (ASAP 2020,

Micromeritics, USA) based on the Brunauer-Emmet-Teller (BET) theory.

## 5. Electrochemical measurements

All electrochemical measurements were conducted with a three-electrode system on a CHI 832D electrochemical analyzer at room temperature. Platinum plate (1 cm<sup>2</sup>), saturated calomel electrode (SCE), and rotating disk electrode (RDE, 4 mm in diameter) were selected as the counter electrode, reference electrode, and working electrode, respectively. In this study, all potentials were measured on the SCE reference electrode and converted to a reversible hydrogen electrode (RHE) reference scale by  $E_{(RHE)} = E_{(SCE)} + 0.059 \text{ pH} + 0.241$ . The catalyst ink was prepared by 5 mg catalyst dispersed 475  $\mu\text{L}$  ethanol and 25  $\mu\text{L}$  Nafion (5 wt%) solution and sonication for 30 min, then dropped the ink on a glassy carbon RRDE with a loading of 0.6 mg cm<sup>-2</sup> to form catalyst film coated electrode and drying in air. For comparison, commercially available 20 wt% Pt/C catalysts were used. The Pt-based ink was obtained in the same way, yielding an approximate mass loading of 80  $\mu\text{g}_{\text{Pt}}$  cm<sup>-2</sup>. The catalytic route of the catalyst can be evaluated according to the H<sub>2</sub>O<sub>2</sub> yield and the electron transfer number (n). The H<sub>2</sub>O<sub>2</sub> yield and electron transfer number (n) can be calculated by using the following equations:

$$H_2O_2(\%) = 200 \times \frac{j_R/N}{j_D + j_R/N}$$

$$n = 4 \times \frac{j_D}{j_D + j_R/N}$$

Where  $j_R$  is the ring current density and  $j_D$  is the disk current density. N equals to 0.42 as the current collection efficiency of the Pt ring. The kinetics parameters of ORR can be analyzed using the Koutecky-Levich (K-L) equation shown as follows:

$$\frac{1}{j} = \frac{1}{j_K} + \frac{1}{j_L} = \frac{1}{j_K} + \frac{1}{B\omega^{1/2}}$$
$$B = 0.62nFC_0(D_0)^{2/3}\nu^{1/6}$$

Where  $j$  is the measured current density,  $j_K$  and  $j_L$  are the kinetic and diffusion-limited current density,  $\omega$  is the electrode rotation rate,  $F$  is the Faraday constant ( $96485 \text{ C mol}^{-1}$ ),  $C_0$  is the bulk concentration of  $\text{O}_2$  ( $1.3 \times 10^{-3} \text{ mol L}^{-1}$ ),  $D_0$  is the diffusion coefficient of  $\text{O}_2$  ( $1.9 \times 10^{-5} \text{ cm}^2 \text{ s}^{-1}$ ) and  $\nu$  is the kinetic viscosity of the electrolyte ( $0.01 \text{ cm}^2 \text{ s}^{-1}$ ).

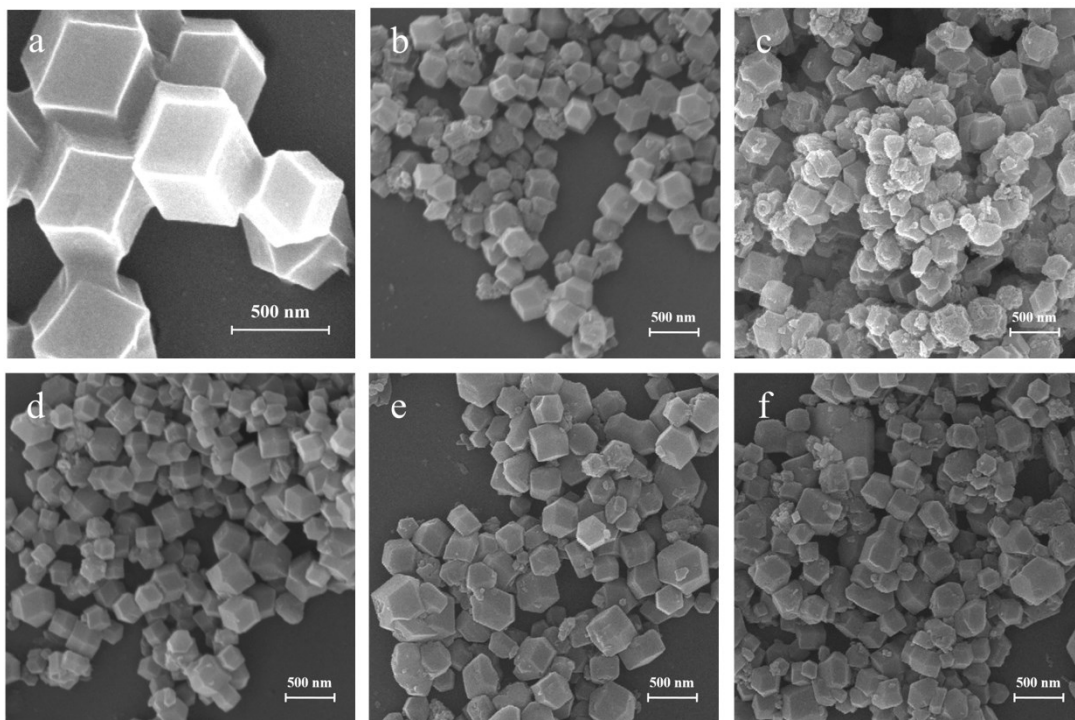

**Fig. S1** SEM images of (a) Fe-ZIF-8, (b) FeNC, (c-f) FeFNC-X (X=1, 3, 10, 20).

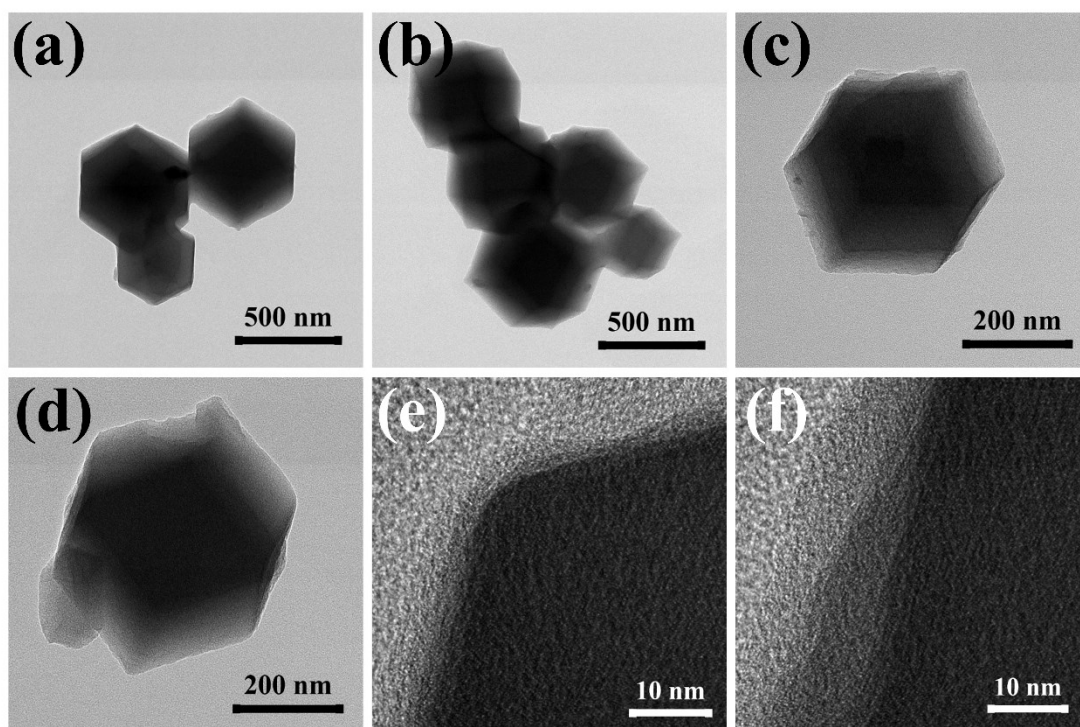

**Fig. S2** (a-d) TEM and (e-f) HR-TEM images of FeFNC-5.

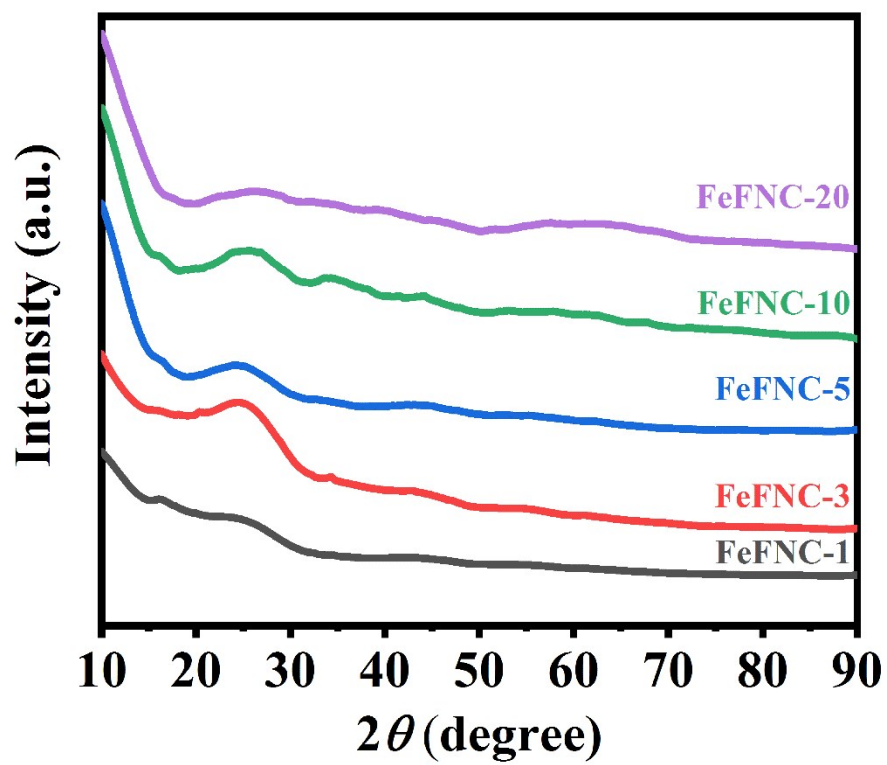

Fig. S3 XRD patterns of FeFNC-X (X=1, 3, 5, 10, 20).



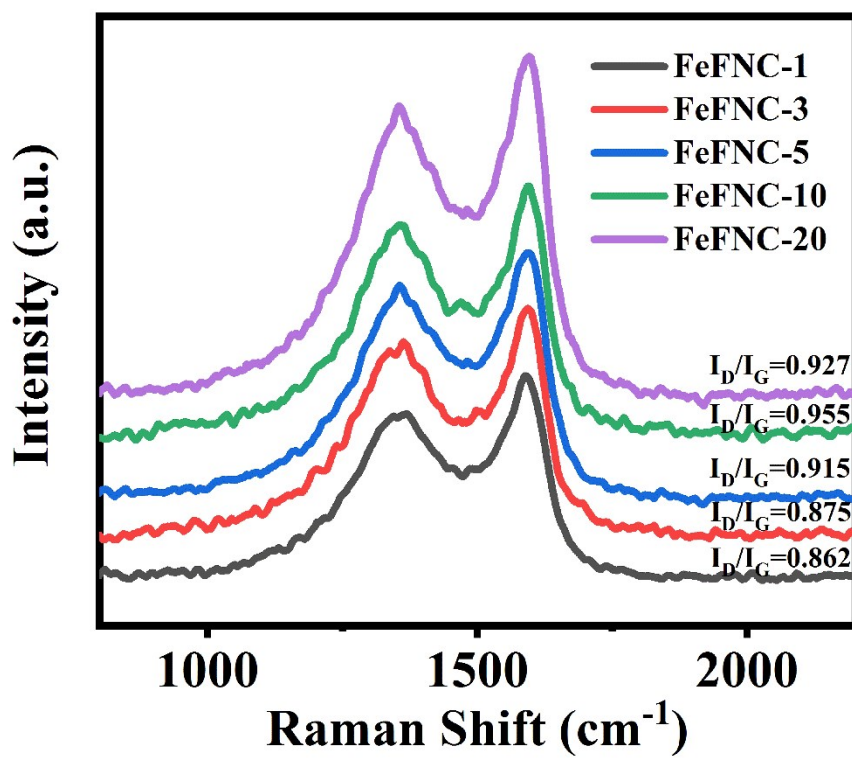

**Fig. S4** Raman spectra of FeFNC-X (X=1, 3, 5, 10, 20).

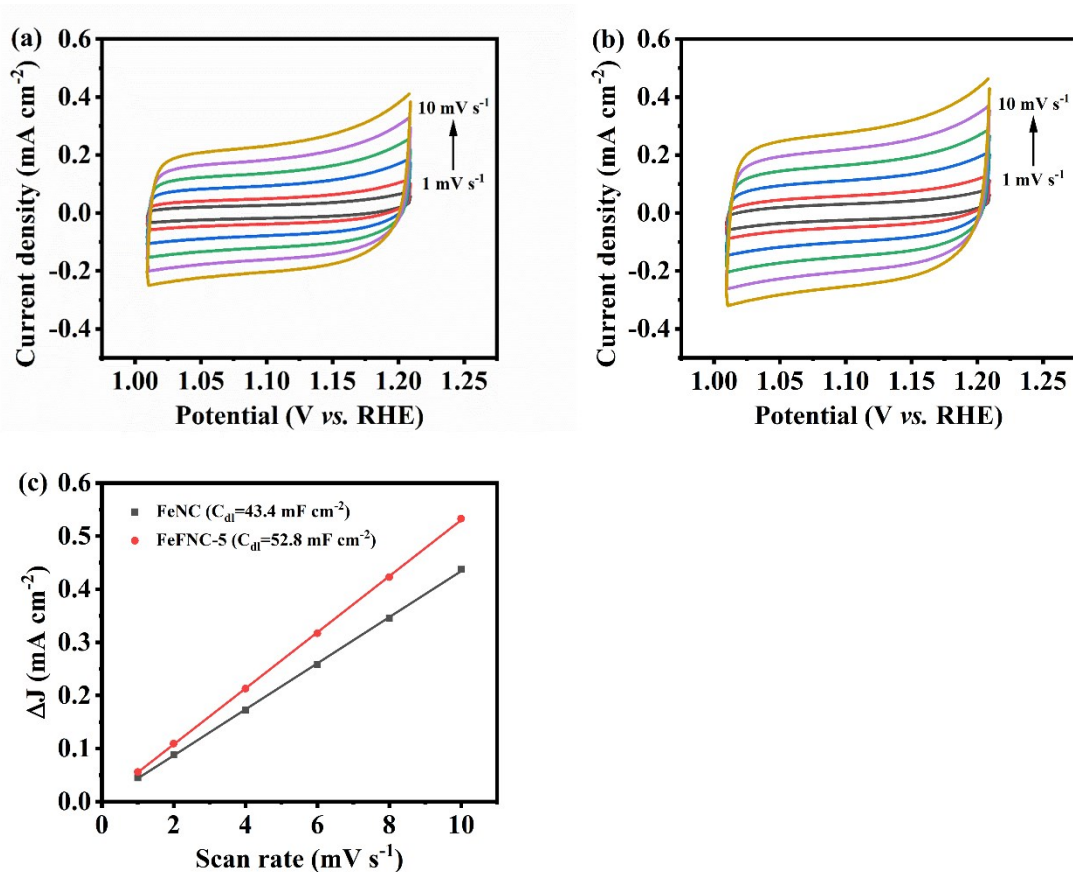

**Fig. S5** CV curves of (a) FeNC and (b) FeFNC-5 at different scan rates of 1, 2, 4, 6, 8, and 10 mV s<sup>-1</sup>, respectively. (c) Plots between current density difference ( $\Delta J$ ) and scan rates at 0.2 V (vs. RHE).

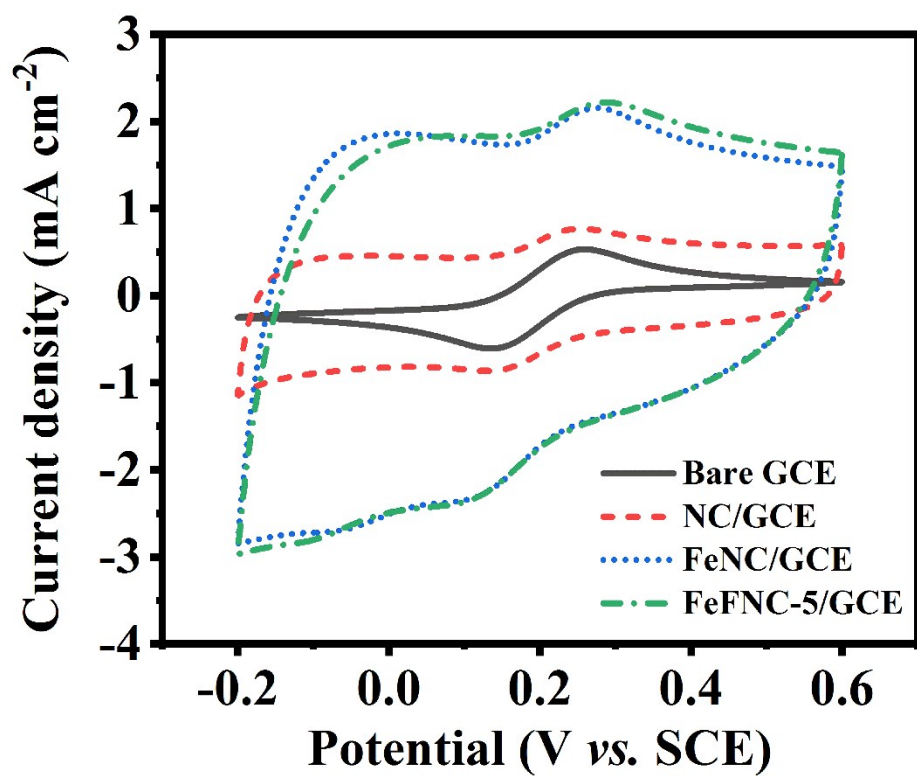

**Fig. S6** CV curves of bare GCE, NC, FeNC, and FeFNC-5 in 5.0 mM  $[\text{Fe}(\text{CN})_6]^{3-/4-}$  containing 0.10 M KCl.

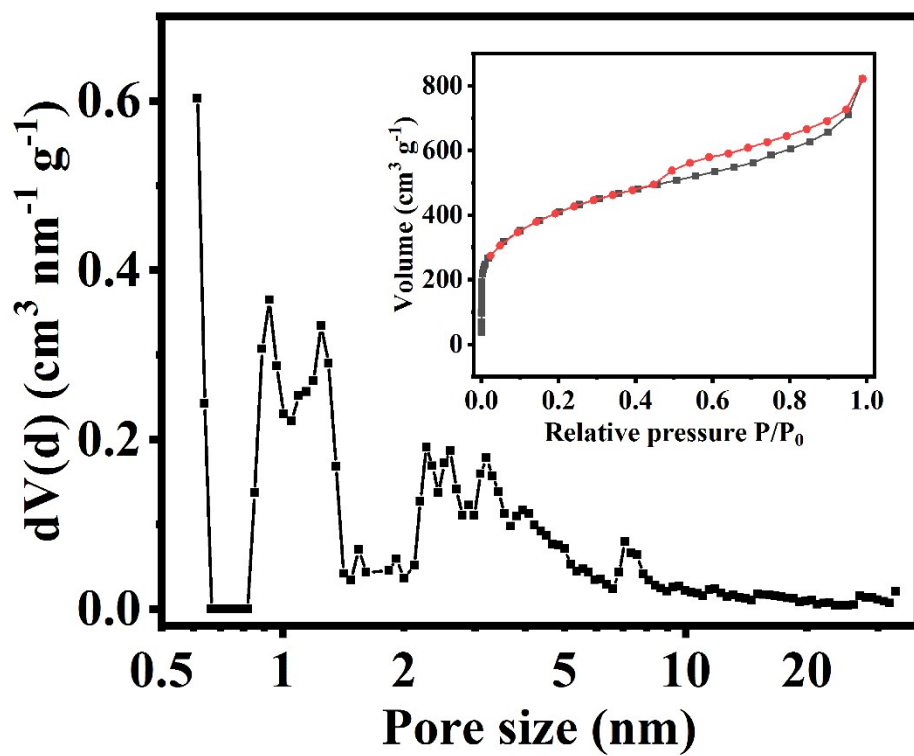

**Fig. S7** Pore size distribution and (inset) nitrogen adsorption-desorption isotherms of FeNC.

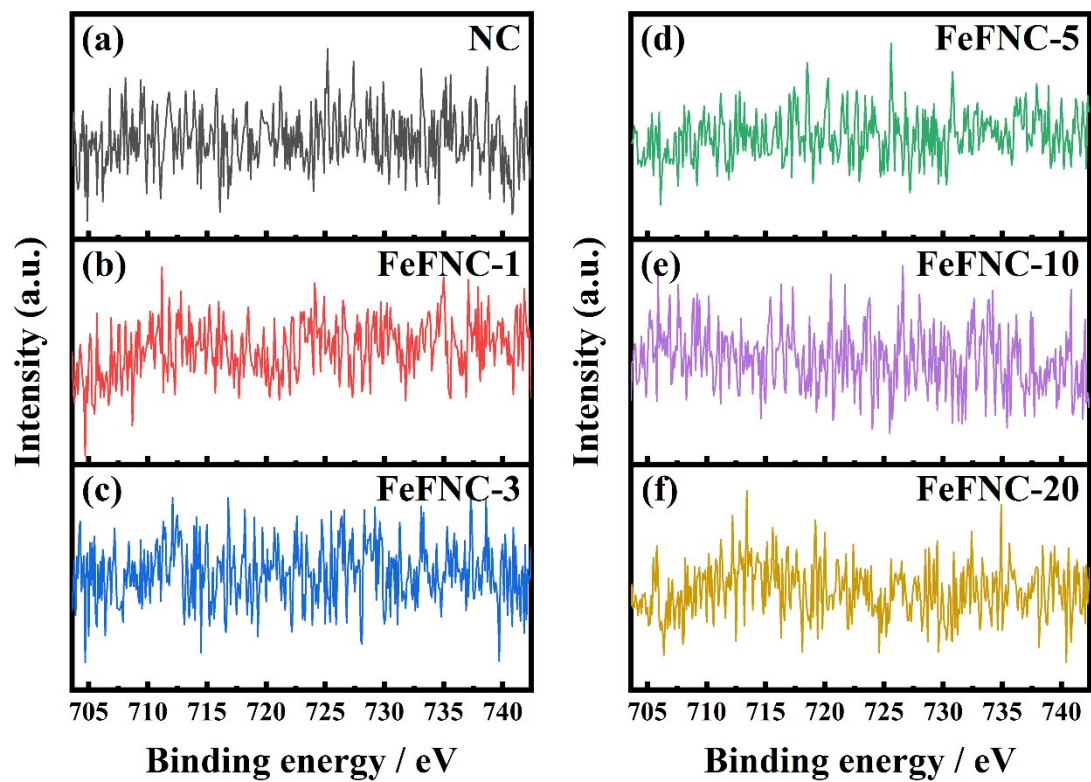

**Fig. S8** The high resolution Fe 2p XPS spectra of (a) NC and (b-f) FeFNC-X (X=1, 3, 5, 10, 20).

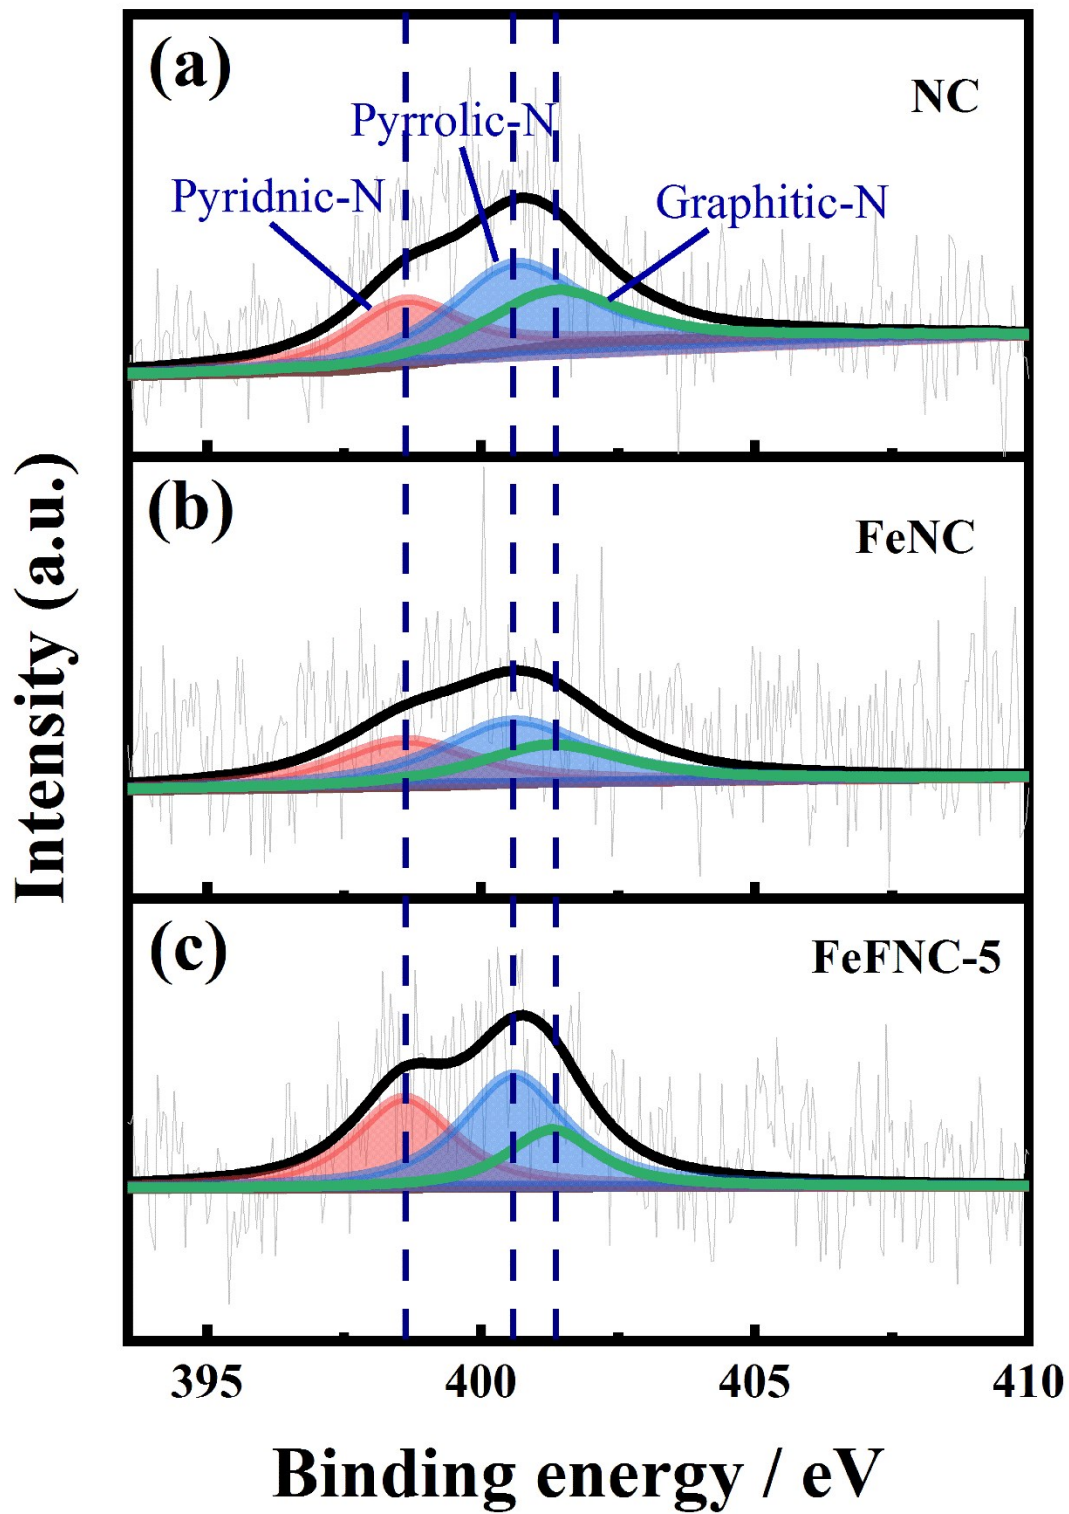

Fig. S9 The high resolution N 1s XPS spectra of (a) NC, (b) FeNC, and (c) FeFNC-5.

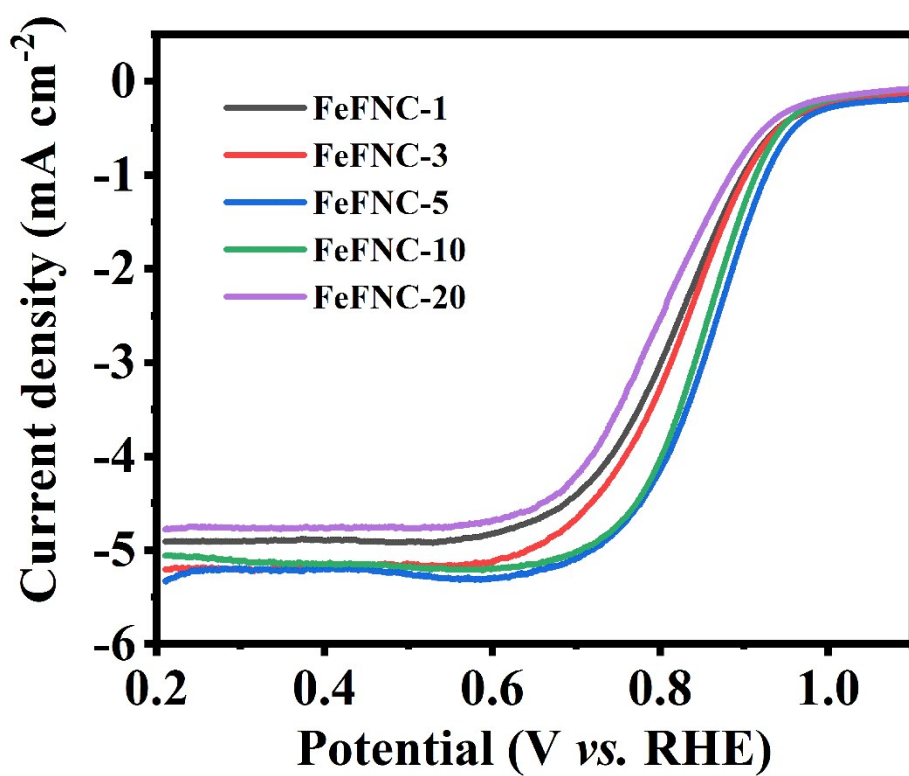

Fig. S10 LSV curves of FeFNC-X (X=1, 3, 5, 10, 20).



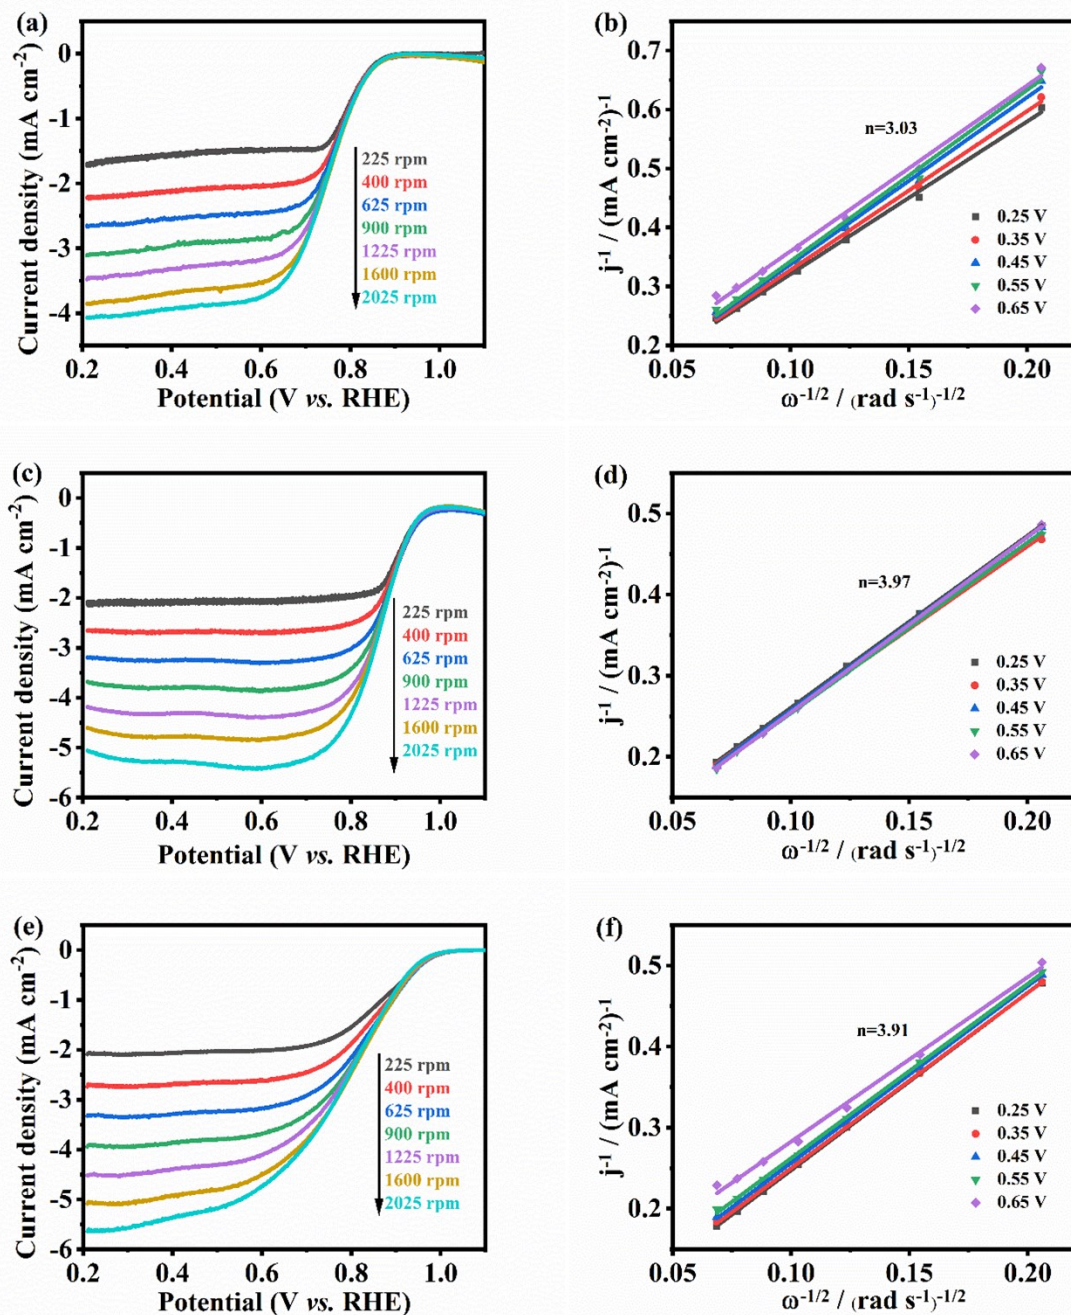

**Fig. S11** RDE voltammograms of (a) NC, (c) FeFNC-5, and (e) Pt/C in O<sub>2</sub>-saturated 0.1 M KOH under different rotational speeds with a sweep rate of 5 mV s<sup>-1</sup>. The corresponding Koutecky-Levich plots of (b) NC, (d) FeFNC-5, and (f) Pt/C at the different potentials.



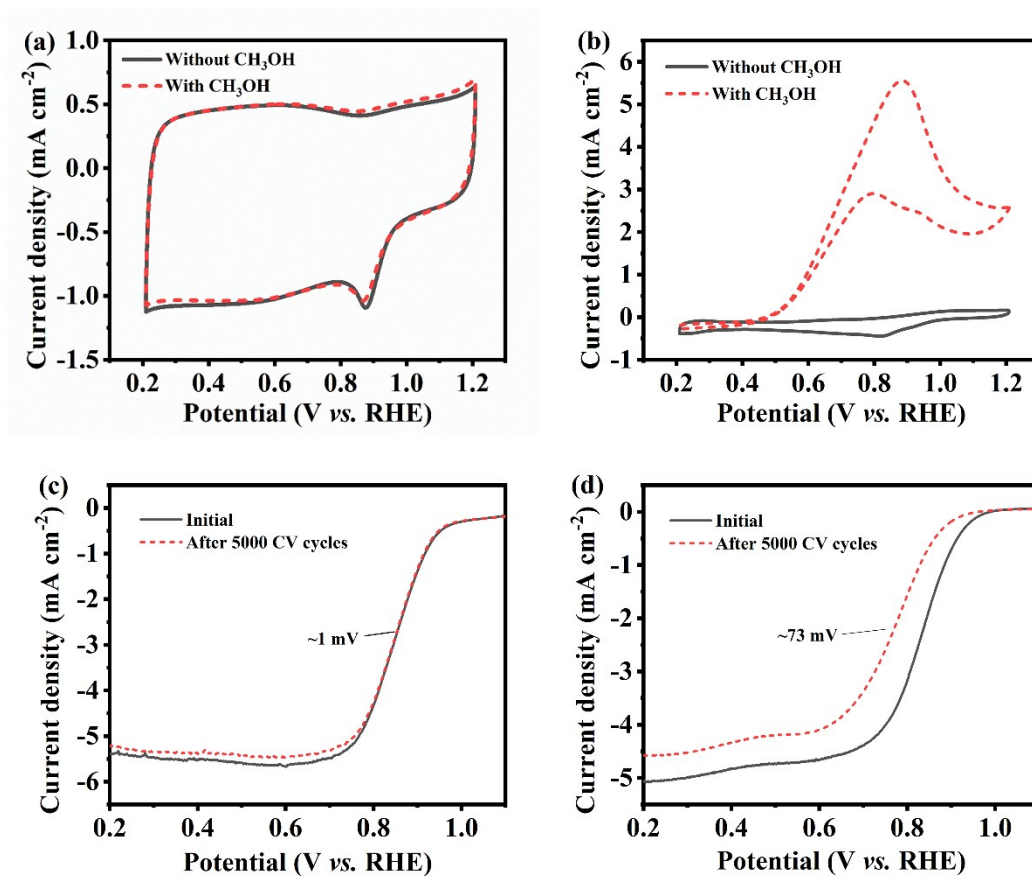

**Fig. S12** The tolerance and stability of FeFNC-5 and Pt/C. The tolerance of (a) FeFNC-5 and (b) Pt/C to methanol in an O<sub>2</sub>-saturated 0.1 M KOH solution at scan rate of 10 mV s<sup>-1</sup>. The long-term operational stability of (c) FeFNC-5 and (d) Pt/C.

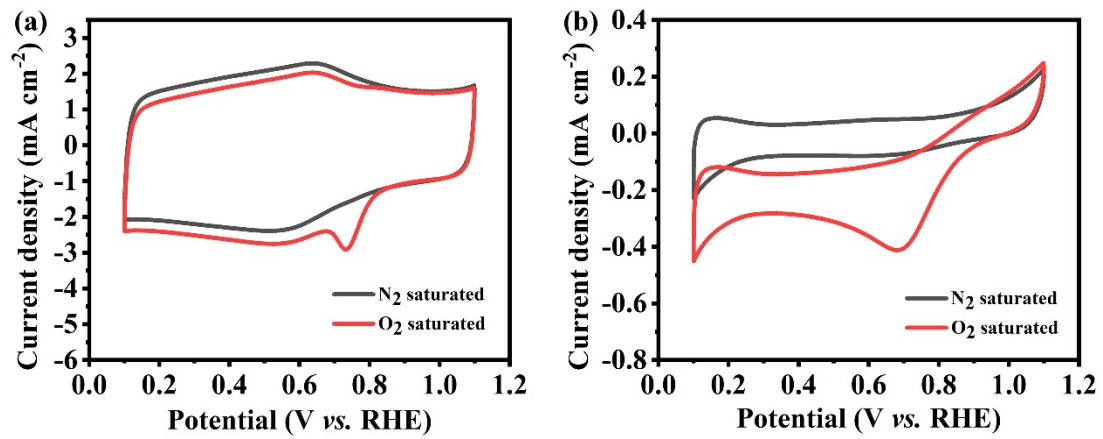

**Fig. S13** CV curves of (a) FeFNC-5 and (b) Pt/C in N<sub>2</sub>-saturated and O<sub>2</sub>-saturated 0.1 M HClO<sub>4</sub> at scan rate of 20 mV s<sup>-1</sup>.

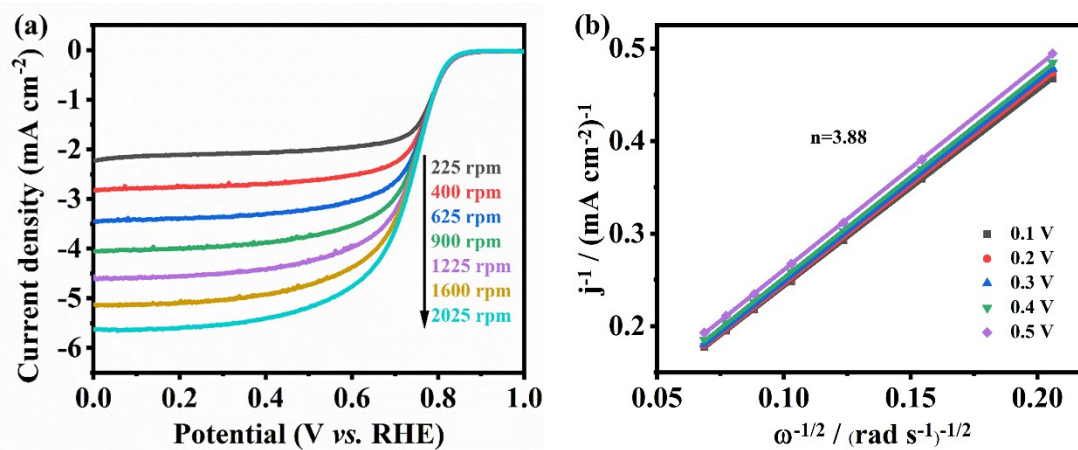

**Fig. S14** (a) RDE voltammograms of FeFNC-5 under different rotational speeds with a sweep rate of  $5 \text{ mV s}^{-1}$  in  $\text{O}_2$ -saturated  $0.1 \text{ M HClO}_4$  and (b) the corresponding Koutecky-Levich plots at the different potentials.

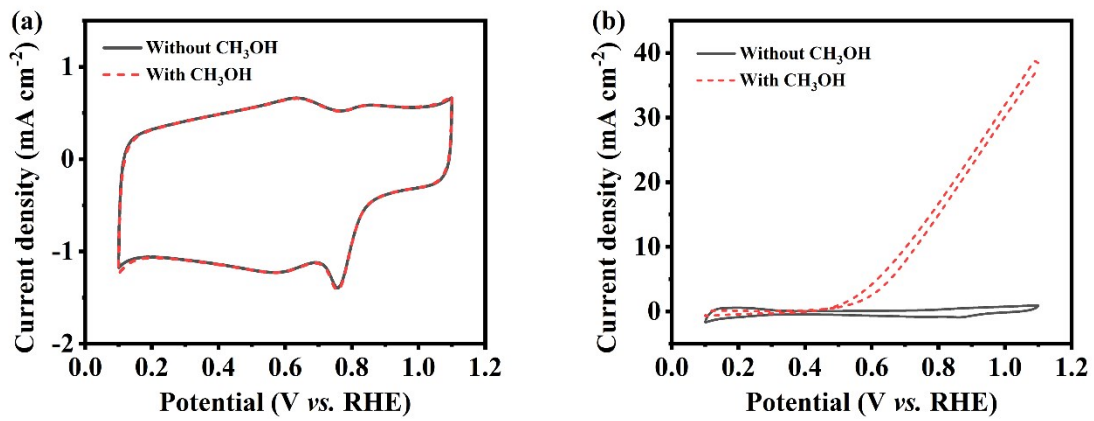

**Fig. S15** The tolerance of (a) FeFNC-5 and (b) Pt/C to methanol in an O<sub>2</sub>-saturated 0.1 M HClO<sub>4</sub> solution at scan rate of 10 mV s<sup>-1</sup>.

**Table S1** Summary of porosity parameters of NC, FeNC, and FeFNC-5.

| Samples | BET SSA (m <sup>2</sup> g <sup>-1</sup> ) | Pore volume (cm <sup>3</sup> g <sup>-1</sup> ) | Pore diameter (nm) |
|---------|-------------------------------------------|------------------------------------------------|--------------------|
| NC      | 1037                                      | 1.214                                          | 4.685              |
| FeNC    | 1390                                      | 1.271                                          | 3.658              |
| FeFNC-5 | 792.9                                     | 0.8142                                         | 4.108              |

**Table S2** Elemental composition of all samples obtain from XPS spectra.

| Samples  | C (at. %) | O (at. %) | N (at. %) | F (at. %) | Fe (at. %) |
|----------|-----------|-----------|-----------|-----------|------------|
| NC       | 86.16     | 10.29     | 3.55      | -         | -          |
| FeNC     | 81.81     | 17.24     | 0.95      | -         | -          |
| FeFNC-1  | 84.26     | 10.43     | 5.04      | -         | 0.26       |
| FeFNC-3  | 83.33     | 14.26     | 2.24      | -         | 0.18       |
| FeFNC-5  | 86.38     | 11.80     | 1.69      | 0.12      | -          |
| FeFNC-10 | 81.83     | 17.08     | 0.91      | 0.17      | -          |
| FeFNC-20 | 75.88     | 21.54     | 0.70      | 1.75      | 0.14       |

**Table S3** Comparison of ORR performance in alkaline medium for FeFNC-5 with other non-noble metal heteroatom doped carbon electrocatalysts.

| Catalyst                                       | $E_{\text{onset}}/\text{V}$ | $E_{1/2}/\text{V}$ | Reference electrode | References |
|------------------------------------------------|-----------------------------|--------------------|---------------------|------------|
| Fe/N/F-MCNF                                    | 0.900                       | 0.822              | vs. RHE             | 1          |
| Co-Fe/NC-700                                   | -                           | 0.854              | vs. RHE             | 2          |
| Fe@NMC-1                                       | 1.01                        | 0.876              | vs. RHE             | 3          |
| NHPC <sub>1:3</sub> -900                       | -                           | 0.87               | vs. RHE             | 4          |
| FeCo@C MS                                      | 1.04                        | 0.85               | vs. RHE             | 5          |
| Co-N-C/CoO <sub>x</sub> -3                     | -                           | 0.82               | vs. RHE             | 6          |
| FeCo-NC-850                                    | 0.997                       | 0.864              | vs. RHE             | 7          |
| Co/NCNT/NG                                     | 0.96                        | 0.85               | vs. RHE             | 8          |
| A-Co/r-GOs (Zn <sub>10</sub> Co <sub>1</sub> ) | 0.974                       | 0.825              | vs. RHE             | 9          |
| Fe-N-C-1                                       | -0.061                      | -0.171             | vs. Ag/AgCl         | 10         |
| 20 wt% Pt/C                                    | 0.980                       | 0.852              | vs. RHE             | this work  |
| FeFNC-5                                        | 0.976                       | 0.872              | vs. RHE             | this work  |

**Table S4** Comparison of ORR performance in acidic medium for FeFNC-5 with other non-noble metal heteroatom doped carbon electrocatalysts.

| Catalyst     | $E_{\text{onset}}$ vs. RHE | $E_{1/2}$ vs. RHE | Electrolyte                          | References |
|--------------|----------------------------|-------------------|--------------------------------------|------------|
| LN-3-1       | 0.892                      | 0.792             | 1 M HClO <sub>4</sub>                | 11         |
| PyN-GDY      | 0.81                       | 0.55              | 0.1 M HClO <sub>4</sub>              | 12         |
| Co-N-C@F127  | 0.93                       | 0.84              | 0.5 M H <sub>2</sub> SO <sub>4</sub> | 13         |
| NFLGDY-900c  | -                          | 0.73              | 0.1 M HClO <sub>4</sub>              | 14         |
| SA-Fe-HPC    | -                          | 0.81              | 0.1 M H <sub>2</sub> SO <sub>4</sub> | 15         |
| SA-Fe/NG     | 0.9                        | 0.8               | 0.5 M H <sub>2</sub> SO <sub>4</sub> | 16         |
| Fe-N-C-950   | 0.92                       | 0.78              | 0.1 M HClO <sub>4</sub>              | 17         |
| Cu@Fe-N-C    | 0.88                       | 0.761             | 0.5 M H <sub>2</sub> SO <sub>4</sub> | 18         |
| 20Co-NC-1100 | 0.93                       | 0.8               | 0.5 M H <sub>2</sub> SO <sub>4</sub> | 19         |
| Mn-NC-second | -                          | 0.8               | 0.5 M H <sub>2</sub> SO <sub>4</sub> | 20         |
| 20 wt% Pt/C  | 0.865                      | 0.748             | 0.1 M HClO <sub>4</sub>              | this work  |
| FeFNC-5      | 0.826                      | 0.749             | 0.1 M HClO <sub>4</sub>              | this work  |



## Notes and references

1. Y. G. Lee and H. J. Ahn, *Appl. Surf. Sci.*, 2019, **487**, 389-397.
2. S. L. Zhang, B. Y. Guan and X. W. D. Lou, *Small*, 2019, **15**, 1805324.
3. X. D. Chen, N. Wang, K. Shen, Y. K. Xie, Y. P. Tan and Y. W. Li, *ACS Appl. Mater. Inter.*, 2019, **11**, 25976-25985.
4. C. J. Xuan, B. S. Hou, W. W. Xia, Z. K. Peng, T. Shen, H. L. Xin, G. A. Zhang and D. L. Wang, *J. Mater. Chem. A*, 2018, **6**, 10731-10739.
5. Y. T. Xu, B. L. Chen, J. Nie and G. P. Ma, *Nanoscale*, 2018, **10**, 17021-17029.
6. W. L. Xin, K. K. Lu and D. Shan, *Appl. Surf. Sci.*, 2019, **481**, 313-318.
7. G. N. Li, K. T. Zheng and C. J. Xu, *Appl. Surf. Sci.*, 2019, **487**, 496-502.
8. L. Yang, Y. L. Lv and D. P. Cao, *J. Mater. Chem. A*, 2018, **6**, 3926-3932.
9. L. J. Zhang, T. C. Liu, N. Chen, Y. Jia, R. S. Cai, W. Theis, X. F. Yang, Y. Z. Xia, D. J. Yang and X. D. Yao, *J. Mater. Chem. A*, 2018, **6**, 18417-18425.
10. X. Xin, H. L. Qin, H. P. Cong and S. H. Yu, *Langmuir*, 2018, **34**, 4952-4961.
11. Y. Shen, Y. Li, G. Yang, Q. Zhang, H. Liang and F. Peng, *J. Energy Chem.*, 2020, **44**, 106-114.
12. Q. Lv, N. Wang, W. Si, Z. Hou, X. Li, X. Wang, F. Zhao, Z. Yang, Y. Zhang and C. Huang, *Appl. Catal. B-Environ.*, 2020, **261**, 118234.
13. Y. He, S. Hwang, D. A. Cullen, M. A. Uddin, L. Langhorst, B. Li, S. Karakalos, A. J. Kropf, E. C. Wegener, J. Sokolowski, M. Chen, D. Myers, D. Su, K. L. More, G. Wang, S. Litster and G. Wu, *Energ. Environ. Sci.*, 2019, **12**, 250-260.
14. Y. Zhao, J. Wan, H. Yao, L. Zhang, K. Lin, L. Wang, N. Yang, D. Liu, L. Song, J. Zhu, L. Gu, L. Liu, H. Zhao, Y. Li and D. Wang, *Nat Chem*, 2018, **10**, 924-931.
15. Z. Zhang, J. Sun, F. Wang and L. Dai, *Angew. Chem. Int. Ed. Engl.*, 2018, **57**, 9038-9043.
16. L. Yang, D. Cheng, H. Xu, X. Zeng, X. Wan, J. Shui, Z. Xiang and D. Cao, *Proc Natl Acad Sci USA*, 2018, **115**, 6626-6631.
17. M. Xiao, J. Zhu, L. Ma, Z. Jin, J. Ge, X. Deng, Y. Hou, Q. He, J. Li, Q. Jia, S. Mukerjee, R. Yang, Z. Jiang, D. Su, C. Liu and W. Xing, *ACS Catal.*, 2018, **8**, 2824-2832.
18. Z. Wang, H. Jin, T. Meng, K. Liao, W. Meng, J. Yang, D. He, Y. Xiong and S. Mu, *Adv. Funct. Mater.*, 2018, **28**, 1802596.
19. X. X. Wang, D. A. Cullen, Y. T. Pan, S. Hwang, M. Wang, Z. Feng, J. Wang, M. H. Engelhard, H. Zhang, Y. He, Y. Shao, D. Su, K. L. More, J. S. Spendelow and G. Wu, *Adv. Mater.*, 2018, **30**, 1706758.
20. J. Li, M. Chen, D. A. Cullen, S. Hwang, M. Wang, B. Li, K. Liu, S. Karakalos, M. Lucero, H. Zhang, C. Lei, H. Xu, G. E. Sterbinsky, Z. Feng, D. Su, K. L. More, G. Wang, Z. Wang and G. Wu, *Nat. Catal.*, 2018, **1**, 935-945.
